# Supplementary material for: Optoacoustic brain stimulation at submillimeter spatial precision
Source: PubMed Central journal article supplement (PMC7021819; doi:10.1038/s41467-020-14706-1), 2020-02-14
Supplement: 41467_2020_14706_MOESM4_ESM.pdf [file 41467_2020_14706_MOESM4_ESM.pdf]

**Title: Supplementary Movie 1**

**Description: Repeated FOC stimulation of primary cortical neurons.** Our point-to-point responses to the reviewers and response on the format check are attached separately.
